# Supplementary material for: Maternal and fetal folate, vitamin B12 and homocysteine concentrations and childhood kidney outcomes
Source: PubMed Central journal article supplement — Am J Kidney Dis. Author manuscript; Available in PMC 2018 Apr 1. (PMC5408932; doi:10.1053/j.ajkd.2016.11.014), 2017-01-28
Supplement: NIHMS72479-supplement-Supplemental_Material.pdf [file NIHMS72479-supplement-Supplemental_Material.pdf]

## Supplementary Materials

# Maternal and fetal folate, vitamin B<sub>12</sub> and homocysteine concentrations and childhood kidney outcomes.

Kozeta Miliku, MD<sup>1,2,3</sup>, Anne Mesu, MSc<sup>1</sup>, Oscar H. Franco MD, PhD<sup>2</sup>, Albert Hofman MD, PhD<sup>2</sup>,  
Eric A.P. Steegers, MD, PhD<sup>4</sup>, Vincent W.V. Jaddoe, MD, PhD\*<sup>1,2,3</sup>

1. The Generation R Study Group, Erasmus University Medical Center, Rotterdam, the Netherlands
2. Department of Epidemiology, Erasmus University Medical Center, Rotterdam, the Netherlands
3. Department of Pediatrics, Erasmus University Medical Center, Rotterdam, the Netherlands
4. Department of Obstetrics and Gynaecology, Erasmus MC, University Medical Center, Rotterdam, the Netherlands

**Supplementary Figure S1.** Flowchart of the study participants

**Supplementary Table S1.** Subjects characteristics in the observed and imputed dataset (N = 4,226)

**Supplementary Table S2.** Biomarkers concentrations per supplement group of folic acid (N = 3,291)

**Supplementary Table S3.** Subject characteristics with and without kidney measurements (N = 6,043)

**Supplementary Table S4.** Associations of maternal folate, vitamin B<sub>12</sub> and homocysteine concentrations during pregnancy with kidney outcomes at the age of 6 years (N = 4,226)

**Supplementary Table S5.** Associations of cord blood folate, vitamin B<sub>12</sub> and homocysteine concentrations with kidney outcomes at the age of 6 years (N = 2,674)

**Supplementary Figure S1. Flowchart of study participants**

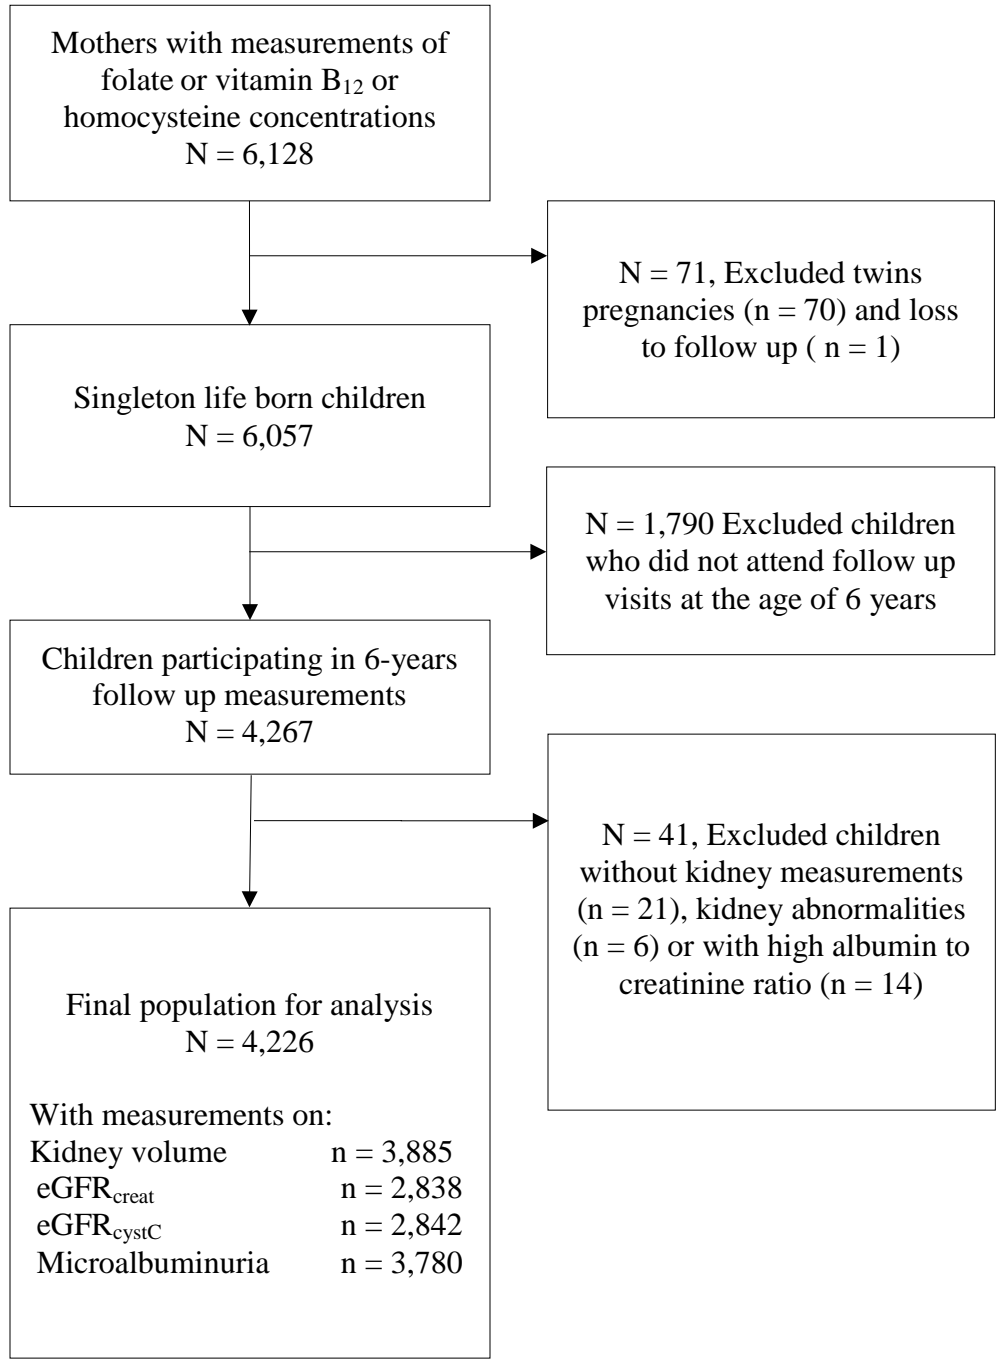

**Supplementary Table S1. Subject characteristics (N = 4,226)**

|                                                       | <b>Observed</b>   | <b>Imputed</b>    |
|-------------------------------------------------------|-------------------|-------------------|
| <b>Maternal characteristics</b>                       |                   |                   |
| Maternal age (y)                                      | 30.4 (4.9)        | 30.4 (4.9)        |
| Pre-pregnancy body mass index(kg/m <sup>2</sup> )     | 22.6 (18.2, 34.6) | 22.6 (18.1, 34.6) |
| Gestational age at intake (wk)                        | 13.5 (2.0)        | 13.5 (2.0)        |
| Education level (%)                                   |                   |                   |
| - No higher education                                 | 51.3              | 52.9              |
| - Higher education                                    | 48.7              | 47.1              |
| Ethnicity (%)                                         |                   |                   |
| - European                                            | 64.9              | 64.8              |
| - Non-European                                        | 35.1              | 35.2              |
| Smoking during pregnancy (%)                          |                   |                   |
| - Never & until pregnancy was known                   | 83.0              | 83.6              |
| - Continued                                           | 17.0              | 16.4              |
| Alcohol during pregnancy (%)                          |                   |                   |
| - Never & until pregnancy was known                   | 57.3              | 57.5              |
| - Continued                                           | 42.7              | 42.5              |
| Folic acid supplements use (%)                        |                   |                   |
| - No                                                  | 21.1              | 21.1              |
| - Start 1st to 10 weeks                               | 32.4              | 32.3              |
| - Start periconceptional                              | 46.5              | 46.6              |
| Maternal calories intake (kcal)                       | 2,045 (553)       | 2,044 (499)       |
| Folate plasma concentrations (nmol/l)                 | 16.8 (5.7, 37.6)  | NI                |
| Homocysteine plasma concentrations (μmol/l)           | 6.9 (4.6, 11.6)   | NI                |
| Vitamin B <sub>12</sub> serum concentrations (pmol/l) | 171 (74.0, 406.0) | NI                |
| <b>Infant characteristics</b>                         |                   |                   |
| Girls (%)                                             | 50.2              | 50.2              |
| Gestational age at birth (wk)                         | 40.1 (35.9, 42.3) | 40.1 (35.9, 42.3) |
| Birth weight (g)                                      | 3,437 (551)       | 3,437 (551)       |
| Breastfeeding in the first 4 months (%)               |                   |                   |
| - No                                                  | 7.5               | 7.7               |
| - Yes                                                 | 92.5              | 92.3              |

|                                                            |                    |                   |
|------------------------------------------------------------|--------------------|-------------------|
| Cord blood folate concentrations (nmol/l)                  | 20.8 (10.4, 38.2)  | NI                |
| Cord blood vitamin B <sub>12</sub> concentrations (pmol/l) | 299 (120.8, 894.4) | NI                |
| Cord blood homocysteine concentrations (μmol/l)            | 9.0 (5.2, 16.4)    | NI                |
| <b>Child characteristics at 6y visit</b>                   |                    |                   |
| Age (y)                                                    | 6.0 (5.6, 7.9)     | 6.0 (5.6, 7.9)    |
| Height (cm)                                                | 119.3 (5.9)        | 119.3 (5.9)       |
| Weight (kg)                                                | 22.4 (17.6, 33.7)  | 22.4 (17.6, 33.7) |
| Body mass index (kg/m <sup>2</sup> )                       | 15.8 (13.6, 21.3)  | 15.8 (13.6, 21.3) |
| Body surface area (m <sup>2</sup> )                        | 0.9 (0.1)          | 0.9 (0.1)         |
| Combined kidney volume (cm <sup>3</sup> )                  | 120.0 (23.6)       | NI                |
| Creatinine (μmol/l)                                        | 37.4 (5.6)         | NI                |
| Cystatin C (mg/l)                                          | 784.4 (81.1)       | NI                |
| eGFR <sub>creat</sub> ( ml/min/1.73m <sup>2</sup> )        | 119.1 (16.3)       | NI                |
| eGFR <sub>cystC</sub> ( ml/min/1.73m <sup>2</sup> )        | 102.4 (14.6)       | NI                |
| Microalbuminuria (%)                                       | 7.5                | NI                |

\* Values are percentages for categorical variables, means (SD) for continuous variables with a normal distribution, or medians (95% range) for continuous variables with a skewed distribution. Abbreviations: GFR<sub>creat</sub> estimated glomerular filtration rate calculated based on creatinine blood levels; eGFR<sub>cystC</sub> estimated glomerular filtration rate calculated based on cystatin C blood levels.

**Supplementary Table S2. Biomarkers concentrations per supplement group of folic acid (N = 3,291)**

| <b>Concentrations during 1<sup>st</sup> trimester</b> |                            |                                            |                                  |
|-------------------------------------------------------|----------------------------|--------------------------------------------|----------------------------------|
|                                                       | <b>Folate<br/>(nmol/l)</b> | <b>Vitamin B<sub>12</sub><br/>(pmol/l)</b> | <b>Homocysteine<br/>(μmol/l)</b> |
| <b>Folic Acid Supplement Use</b>                      |                            |                                            |                                  |
| No (n = 696)                                          | 8.70 (4.90, 20.8)          | 158.00 (61.00, 397.05)                     | 7.40 (4.78, 13.80)               |
| Started when pregnancy was known (n = 1,065)          | 17.70 (7.02, 36.00)        | 177.00 (75.01, 397.00)                     | 6.90 (4.60, 11.10)               |
| Started periconceptual (n = 1,530)                    | 22.70 (8.40, 39.63)        | 177.00 (82.00, 427.10)                     | 6.70 (4.60, 10.57)               |
| <b>Cord blood concentrations</b>                      |                            |                                            |                                  |
|                                                       | <b>Folate<br/>(nmol/l)</b> | <b>Vitamin B<sub>12</sub><br/>(pmol/l)</b> | <b>Homocysteine<br/>(μmol/l)</b> |
| <b>Folic Acid Supplement Use</b>                      |                            |                                            |                                  |
| No (n = 425)                                          | 18.80 (9.95, 35.36)        | 289.00 (112.60, 840.60)                    | 9.40 (5.80, 19.44)               |
| Started when pregnancy was known (n = 684)            | 20.20 (10.38, 40.00)       | 297.00 (115.85, 914.10)                    | 9.05 (5.30, 15.83)               |
| Started periconceptual (n = 980)                      | 22.70 (11.20, 39.23)       | 304.00 (134.00, 874.13)                    | 8.80 (5.10, 16.20)               |

Values are medians (95% range).

**Supplementary Table S3. Subject characteristics with and without kidney measurements (N = 6,043)**

|                                                       | <i>Kidney measurements available</i><br><i>N = 4,226</i> | <i>Without kidney measurements</i><br><i>N = 1,817</i> | <i>p-value</i> |
|-------------------------------------------------------|----------------------------------------------------------|--------------------------------------------------------|----------------|
| <b>Maternal characteristics</b>                       |                                                          |                                                        |                |
| Maternal age (y)                                      | 30.4 (4.9)                                               | 28.4 (5.2)                                             | < <b>0.01</b>  |
| Pre-pregnancy body mass index(kg/m <sup>2</sup> )     | 22.6 (18.1, 34.6)                                        | 22.6 (17.6, 35.2)                                      | 0.47           |
| Gestational age at intake                             | 13.5 (2.0)                                               | 13.4 (2.1)                                             | < <b>0.01</b>  |
| Education level (%)                                   |                                                          |                                                        | < <b>0.01</b>  |
| - No higher education                                 | 52.9                                                     | 66.6                                                   |                |
| - Higher education                                    | 47.1                                                     | 33.4                                                   |                |
| Ethnicity (%)                                         |                                                          |                                                        | < <b>0.01</b>  |
| - European                                            | 64.8                                                     | 52.2                                                   |                |
| - Non-European                                        | 35.2                                                     | 47.8                                                   |                |
| Smoking during pregnancy (%)                          |                                                          |                                                        | < <b>0.01</b>  |
| - Never & until pregnancy was known                   | 83.6                                                     | 67.4                                                   |                |
| - Continued                                           | 16.4                                                     | 19.6                                                   |                |
| Alcohol during pregnancy (%)                          |                                                          |                                                        | < <b>0.01</b>  |
| - Never & until pregnancy was known                   | 57.5                                                     | 69.5                                                   |                |
| - Continued                                           | 42.5                                                     | 30.5                                                   |                |
| Folic acid supplements use (%)                        |                                                          |                                                        | < <b>0.01</b>  |
| - No                                                  | 21.1                                                     | 36.6                                                   |                |
| - Start 1st to 10 weeks                               | 32.3                                                     | 30.4                                                   |                |
| - Start periconceptional                              | 46.6                                                     | 33.0                                                   |                |
| Maternal calories intake (kcal)                       | 2,045 (553)                                              | 2,012 (485)                                            | <b>0.03</b>    |
| Folate plasma concentrations (nmol/l)                 | 16.8 (5.8, 37.6)                                         | 13.2 (5.0, 37.1)                                       | < <b>0.01</b>  |
| Vitamin B <sub>12</sub> serum concentrations (pmol/l) | 171 (74.0, 406.0)                                        | 165 (68.0, 419.0)                                      | 0.06           |
| Homocysteine plasma concentrations (μmol/l)           | 6.9 (4.6, 11.6)                                          | 7.0 (4.6, 12.9)                                        | <b>0.03</b>    |
| <b>Infant characteristics</b>                         |                                                          |                                                        |                |
| Girls (%)                                             | 50.2                                                     | 47.5                                                   |                |
| Gestational age at birth (wk)                         | 40.1 (35.9, 42.3)                                        | 40.0 (34.2, 42.3)                                      | < <b>0.01</b>  |
| Birth weight (g)                                      | 3,437 (551)                                              | 3,379 (592)                                            | < <b>0.01</b>  |
| Breastfeeding (%)                                     |                                                          |                                                        | <b>0.01</b>    |
| - No                                                  | 7.7                                                      | 8.9                                                    |                |
| - Yes                                                 | 92.3                                                     | 91.1                                                   |                |

|                                                            |                    |                     |                  |
|------------------------------------------------------------|--------------------|---------------------|------------------|
| Cord blood folate concentrations (nmol/l)                  | 20.8 (10.4, 38.2)  | 20.3 (10.4, 38.7)   | 0.08             |
| Cord blood vitamin B <sub>12</sub> concentrations (pmol/l) | 299 (120.8, 894.4) | 301 (115.9, 931, 9) | 0.76             |
| Cord blood homocysteine concentrations (μmol/l)            | 9.0 (5.2, 16.4)    | 9.3 (5.1, 17.2)     | <b>&lt; 0.01</b> |

Values are percentages for categorical variables, means (SD) for continuous variables with a normal distribution, or medians (95% range) for continuous variables with a skewed distribution.

**Supplementary Table S4. Associations of maternal folate, vitamin B<sub>12</sub> and homocysteine concentrations during pregnancy with kidney outcomes at the age of 6 years (N = 4,226)**

| First trimester maternal concentrations   | Difference in outcome measure (95% Confidence Interval) |                                                    |                                                    |                               |
|-------------------------------------------|---------------------------------------------------------|----------------------------------------------------|----------------------------------------------------|-------------------------------|
|                                           | Kidney volume (cm <sup>3</sup> )                        | eGFR <sub>creat</sub> (ml/min/1.73m <sup>2</sup> ) | eGFR <sub>cystC</sub> (ml/min/1.73m <sup>2</sup> ) | Microalbuminuria (odds ratio) |
| <b>Folate (n = 4,149)</b>                 | (n = 3,818)                                             | (n = 2,788)                                        | (n = 2,792)                                        | (n = 4,011)                   |
| Basic Model                               | <b>0.83 (0.10, 1.55)*</b>                               | 0.30 (-0.31, 0.91)                                 | 0.21 (-0.35, 0.76)                                 | 1.01 (0.90, 1.14)             |
| <b>Vitamin B<sub>12</sub> (n = 3,983)</b> | (n = 3,666)                                             | (n = 2,659)                                        | (n = 2,663)                                        | (n = 3,849)                   |
| Basic Model                               | 0.21 (-0.52, 0.94)                                      | 0.28 (-0.34, 0.89)                                 | <b>1.11 (0.55, 1.67)**</b>                         | 1.07 (0.96, 1.20)             |
| <b>Homocysteine (n = 4,105)</b>           | (n = 3,779)                                             | (n = 2,755)                                        | (n = 2,751)                                        | (n = 3,969)                   |
| Basic Model                               | <b>-1.66 (-2.40, -0.93)**</b>                           | <b>-0.78 (-1.37, -0.18)*</b>                       | <b>-0.75 (-1.29, -0.20)**</b>                      | 1.07 (0.97, 1.19)             |

Values are linear and logistic regression coefficients (95% confidence interval). Basic model is adjusted for child's sex and age at 6 year visit. \* p < 0.05, \*\*p<0.01. Maternal folate, vitamin B<sub>12</sub> and homocysteine concentrations were analyzed per 1 standard deviation in folate, vitamin B<sub>12</sub> and homocysteine. Abbreviations: eGFR<sub>creat</sub>, estimated glomerular filtration rate based on creatinine concentrations; eGFR<sub>cystC</sub>, estimated glomerular filtration rate based on cystatin C concentrations.



**Supplementary Table S5. Associations of cord blood folate, vitamin B<sub>12</sub> and homocysteine concentrations with kidney outcomes at the age of 6 years (N = 2,674)**

| Cord blood concentrations                 | Difference in outcome measure (95% Confidence Interval) |                                                       |                                                       |                                  |
|-------------------------------------------|---------------------------------------------------------|-------------------------------------------------------|-------------------------------------------------------|----------------------------------|
|                                           | Kidney volume<br>(cm <sup>3</sup> )                     | eGFR <sub>creat</sub><br>(ml/min/1.73m <sup>2</sup> ) | eGFR <sub>cystC</sub><br>(ml/min/1.73m <sup>2</sup> ) | Microalbuminuria<br>(odds ratio) |
| <b>Folate (n = 2,599)</b>                 | <b>(n = 2,384)</b>                                      | <b>(n = 1,750)</b>                                    | <b>(n = 1,753)</b>                                    | <b>(n = 2,517)</b>               |
| Basic Model                               | 0.04 (-0.87, 0.94)                                      | 0.51 (-0.24, 1.25)                                    | <b>0.72 (0.03, 1.41)*</b>                             | 0.98 (0.84, 1.14)                |
| <b>Vitamin B<sub>12</sub> (n = 2,631)</b> | <b>(n = 2,413)</b>                                      | <b>(n = 1,772)</b>                                    | <b>(n = 1,776)</b>                                    | <b>(n = 2,548)</b>               |
| Basic Model                               | <b>-0.93 (-1.82, -0.04)*</b>                            | -0.43 (-1.18, 0.33)                                   | 0.41 (-0.28, 1.10)                                    | 1.01 (0.88, 1.17)                |
| <b>Homocysteine (n = 2,522)</b>           | <b>(n = 2,311)</b>                                      | <b>(n = 1,702)</b>                                    | <b>(n = 1,705)</b>                                    | <b>(n = 2,443)</b>               |
| Basic Model                               | <b>1.25 (0.33, 2.16)**</b>                              | <b>-1.06 (-1.85, -0.28)**</b>                         | <b>-1.22 (-1.95, -0.50)**</b>                         | 1.07 (0.93, 1.23)                |

Values are linear and logistic regression coefficients (95% confidence interval). Basic model is adjusted for child's sex and age at 6 year visit. \* p < 0.05, \*\*p<0.01. Cord blood folate, vitamin B<sub>12</sub> and homocysteine concentrations were analyzed per 1 standard deviation in folate, vitamin B<sub>12</sub> and homocysteine. Abbreviations: eGFR<sub>creat</sub>, estimated glomerular filtration rate based on creatinine concentrations; eGFR<sub>cystC</sub>, estimated glomerular filtration rate based on cystatin C concentrations.
